# Supplementary material for: New approaches for long-term conservation of rooster spermatozoa
Source: PubMed Central journal article supplement — Poult Sci. 2022 Dec 6;102(2):102386. doi: 10.1016/j.psj.2022.102386 (PMC9817176; doi:10.1016/j.psj.2022.102386), 2022-12-06
Supplement: mmc1.pdf [file mmc1.pdf]

This document certifies that the manuscript

## NEW APPROACHES FOR LONG-TERM CONSERVATION OF ROOSTER SPERMATOZOA

prepared by the authors

Martina Janosikova, Kristyna Petricakova, Martin Ptacek, Filipp Georgijevic Savvulidi,  
Jana Rychtarova, Josef Fulka Jr.

was edited for proper English language, grammar, punctuation, spelling, and overall style  
by one or more of the highly qualified native English speaking editors at SNAS.

This certificate was issued on **October 27, 2022** and may be verified  
on the [SNAS website](#) using the verification code **FC3D-4OCB-A5AF-B301-D489**.

Neither the research content nor the authors' intentions were altered in any way during the editing process. Documents receiving this certification should be English-ready for publication; however, the author has the ability to accept or reject our suggestions and changes. To verify the final

SNAS edited version, please visit our verification page at [secure.authorservices.springernature.com/certificate/verify](https://secure.authorservices.springernature.com/certificate/verify).

If you have any questions or concerns about this edited document, please contact SNAS at [support@as.springernature.com](mailto:support@as.springernature.com).
